# Supplementary material for: RUNX1 Is a Key Target in t(4;11) Leukemias that Contributes to Gene Activation through an AF4-MLL Complex Interaction
Source: PubMed Central journal article supplement (PMC3607232; doi:10.1016/j.celrep.2012.12.016), 2013-01-31
Supplement: mmc2.pdf [file mmc2.pdf]

**Table S2. P-Values in Three B-ALL Clinical Trials, Related to Figure 2 and Figure S2**

| St Jude ALL pvalues    |                | BCR-ABL (n=15) | E2A-PBX1 (n=18) | ETV6-RUNX1 (n=20) | Others (n=28)  | preB       |
|------------------------|----------------|----------------|-----------------|-------------------|----------------|------------|
| <i>RUNX1</i>           | MLLr (n=20)    | 0.006          | n.s.            | n.s.              | 0.002          | N/A        |
| <i>HOXA9</i>           | MLLr (n=20)    | 0.0002         | 0.0001          | 4.51E-05          | 3.39E-05       | N/A        |
| <i>HOXA10</i>          | MLLr (n=20)    | 0.0008         | 0.0012          | 2.28-04           | 2.15E-02       | N/A        |
| <i>CDKN1B</i>          | MLLr (n=20)    | 0.0002         | 1.61E-07        | 2.02E-09          | 4.25E-08       | N/A        |
| COG ALL P9906 pvalues  |                | BCR-ABL        | E2A-PBX1 (n=23) | ETV6-RUNX1 (n=3)  | Others (n=155) | preB       |
| <i>RUNX1</i>           | MLLr (n=21)    | N/A            | 0.004           | n.s.              | 0.0005         | N/A        |
| <i>HOXA9</i>           | MLLr (n=21)    | N/A            | 2.04E-07        | n.s.              | 3.70E-10       | N/A        |
| <i>HOXA10</i>          | MLLr (n=21)    | N/A            | 9.76E-07        | n.s.              | 2.38E-09       | N/A        |
| <i>CDKN1B</i>          | MLLr (n=21)    | N/A            | 0.019           | 0.001             | 0.005          | N/A        |
| ECOG ALL E2993 pvalues |                | BCR-ABL (n=78) | E2A-PBX1 (n=6)  | MLLr (n=8)        | Others (n=82)  | preB (n=3) |
| <i>RUNX1</i>           | t(4;11) (n=17) | 0.004          | n.s.            | 0.037             | 0.041          | 0.028      |
| <i>HOXA9</i>           | t(4;11) (n=17) | 1.96E-10       | 0.0004          | n.s.              | 2.02E-10       | 0.008      |
| <i>HOXA10</i>          | t(4;11) (n=17) | 1.62E-10       | 2.00E-05        | n.s.              | 1.32E-10       | 0.0018     |
| <i>CDKN1B</i>          | t(4;11)(n=17)  | 2.05E-02       | n.s.            | n.s.              | 5.00E-03       | 0.007      |

n.s.; non significant, p>0.05

**Table S3. Average Expression of *RUNX1* in Three B-ALL Patient Cohorts, Related to Figure 2**

| <i>RUNX1</i> average expression values | MLLr avg. | BCR-ABL avg. | E2A-PBX1 avg. | ETV6-RUNX1 avg. | Others avg. | preB avg. | t(4;11) avg. | Other MLLr avg. |
|----------------------------------------|-----------|--------------|---------------|-----------------|-------------|-----------|--------------|-----------------|
| St Jude                                | 4.659     | 4.433        | 4.647         | 4.568           | 4.447       | N/A       | N/A          | N/A             |
| COG ALL P9906                          | 8.509     | N/A          | 7.982         | 7.423           | 8.014       | N/A       | N/A          | N/A             |
| ECOG ALL E2993                         | 9.024     | 8.573        | 8.616         | N/A             | 8.791       | 7.961     | 9.174        | 8.703           |

**Table S4. Fold Change of *RUNX1* Gene Expression in Three B-ALL Patient Cohorts, Related to Figure 2**

| <i>RUNX1</i> average expression fold change | BCR-ABL avg. fold change | E2A-PBX1 avg. fold change | ETV6-RUNX1 avg. fold change      | Others avg. fold change | preB avg. fold change             | Other MLLr avg. fold change |
|---------------------------------------------|--------------------------|---------------------------|----------------------------------|-------------------------|-----------------------------------|-----------------------------|
| St Jude (MLLr vs. others)                   | 1.169647<br>p=0.006      | 1.008513<br>p= n.s.       | 1.065644<br>p= n.s.              | 1.158339<br>p=0.002     | N/A                               | N/A                         |
| COG P9906 (MLLr vs. others)                 | N/A                      | 1.441242<br>p=0.004       | <b>2.122593</b><br><b>p=0.08</b> | 1.409682<br>p=0.0005    | N/A                               | N/A                         |
| ECOG E2993 (t-4;11 vs. others)              | 1.516827<br>p=0.004      | 1.472198<br>p= n.s.       | N/A                              | 1.30465<br>p=0.041      | <b>2.318857</b><br><b>p=0.028</b> | 1.386325<br>p=0.037         |

n.s.; non significant, p>0.05
